# Supplementary material for: Substrate and standard evaluation for correlative elemental mapping of biological samples by X-ray fluorescence microscopy and laser ablation ICP-MS
Source: Royal Society of Chemistry journal article supplement (doi:10.1039/d5ja00371g), 2026-01-01
Supplement: d5ja00371g1.pdf [file d5ja00371g1.pdf]

Electronic Supplementary Information for:

**Substrate and standard evaluation for correlative elemental mapping of biological samples by X-ray fluorescence microscopy and laser ablation ICP-MS**

David Z. Zee,<sup>1,2</sup> Soo Hyun Ahn,<sup>1</sup> Andrew M. Crawford,<sup>1,2</sup>  
Niharika Sinha,<sup>1,2</sup> Qiaoling Jin,<sup>3,4</sup> Chris Jacobsen,<sup>4</sup> Evan Maxey,<sup>3</sup>  
Barry Lai,<sup>3</sup> Keith W. MacRenaris,<sup>\*1,2</sup> and Thomas V. O'Halloran<sup>\*1,2</sup>

<sup>1</sup>*The Elemental Health Institute and the Departments of Microbiology, Genetics, and Immunology and of*<sup>2</sup>*Chemistry, Michigan State University, East Lansing, Michigan 48824, United States.*

<sup>3</sup>*X-ray Science Division, Advanced Photon Source, Argonne National Laboratory, Lemont, Illinois 60439, United States*

<sup>4</sup>*Department of Physics and Astronomy, Northwestern University, Evanston, Illinois 60208, United States*

\*Email: [macrenar@msu.edu](mailto:macrenar@msu.edu); [ohallor8@msu.edu](mailto:ohallor8@msu.edu)

*J. Anal. At. Spectrom.*

## Table of Contents

|                                                                                                                    |               |
|--------------------------------------------------------------------------------------------------------------------|---------------|
| <b>Table S1.</b> Commercial substrate materials examined in this study.                                            | <b>S3</b>     |
| <b>Table S2.</b> Experimental parameters for LA-ICP-TOF-MS.                                                        | <b>S4</b>     |
| <b>Figure S1.</b> Chemical structures of the substrates with well-characterized compositions.                      | <b>S5</b>     |
| <b>Table S3.</b> Elemental contents of substrates used as determined by ICP-MS analysis of acid digests.           | <b>S6</b>     |
| <b>Table S4.</b> Elemental minimum detection limits of X-ray fluorescence microscopy when using a given substrate. | <b>S7</b>     |
| <b>Figure S2–S6.</b> LA-ICP-TOF-MS calibration curves for gelatin standards on various substrates.                 | <b>S8–S12</b> |
| <b>Figure S7.</b> LA-ICP-TOF-MS maps of murine brain and kidney on substrates.                                     | <b>S13</b>    |
| <b>Figure S8.</b> Laser fluence testing of murine brain on substrates.                                             | <b>S14</b>    |

**Table S1.** Commercial substrate materials examined in this study.

| name            | supplier                           | catalog no. | lot no.        | thickness ( $\mu\text{m}$ ) | cost per area <sup>c</sup><br>(\$ / $\text{cm}^2$ ) |
|-----------------|------------------------------------|-------------|----------------|-----------------------------|-----------------------------------------------------|
| polypropylene   | Chemplex                           | 3020        | 820618S1A      | 6.0                         | 0.009                                               |
| Prolene         | Chemplex                           | 3018A       | 840427S1A      | 3.0                         | 0.01                                                |
| Mylar           | Chemplex                           | 3012        | 830121S1A      | 2.5                         | 0.007                                               |
| Ultra-Polyester | Chemplex                           | 3090        | 820627S1A      | 1.5                         | 0.01                                                |
| Etnom           | Chemplex                           | 3095        | 820910S1A      | 1.5                         | 0.01                                                |
| Kapton          | Chemplex                           | 3022-5      | — <sup>a</sup> | 7.5                         | 0.04                                                |
| Ultralene       | SPEX /<br>Cole-Parmer              | 3525        | — <sup>a</sup> | 4.0                         | 0.003                                               |
| Kapton          | SPEX /<br>Cole-Parmer              | 3511        | — <sup>a</sup> | 8.0                         | 0.01                                                |
| Zythene         | Chemplex                           | 3081        | 110477S1A      | 6.0                         | 0.01                                                |
| Thermanox       | Nunc /<br>ThermoFisher             | 150067      | — <sup>a</sup> | 200                         | 14                                                  |
| silicon nitride | Norcada                            | NX151000D   | — <sup>a</sup> | 0.200                       | 190                                                 |
| Kapton tape     | Electron<br>Microscopy<br>Sciences | 77708-04    | — <sup>a</sup> | 68.6 <sup>b</sup>           | 0.01                                                |

<sup>a</sup>Information not provided.<sup>b</sup>Total thickness comprising a 25.4  $\mu\text{m}$  thick layer of Kapton HN and a 43.2  $\mu\text{m}$  thick layer of silicone adhesive.<sup>c</sup>Estimated using retail prices as of April 2025, not including any discounts.

**Table S2.** Experimental parameters for LA-ICP-TOF-MS.

| ICP-MS parameters (Tofwerk S2)              | value                |
|---------------------------------------------|----------------------|
| RF power                                    | 1550 W               |
| sampling depth                              | 4.9 mm               |
| cone material                               | nickel               |
| cone insert                                 | 3.5 mm               |
| plasma gas flow                             | 14.0 L/min           |
| auxillary gas flow                          | 8.0 L/min            |
| nebulizer gas flow                          | 0.95–1.01 L/min      |
| measurement mode                            | CCT mode             |
| CCT gas flow (100% He)                      | 5 mL/min             |
| CCT focus lens                              | −19.5 V              |
| CCT entry lens                              | −180 V               |
| CCT mass                                    | 250 V                |
| CCT bias                                    | 10 V                 |
| CCT exit lens                               | −200 V               |
| time-of-flight parameters (Tofwerk S2)      | value                |
| <i>m/z</i> range                            | 14–256               |
| resolution, $m/\Delta m$                    | 1000                 |
| ODG settings                                | 24 ms                |
| notch bias                                  | −80 V                |
| notch (40 amu)                              | 1.6 V                |
| notch (36 amu)                              | 1 V                  |
| notch (28 amu)                              | 2 V                  |
| notch (15.8 amu)                            | 2 V                  |
| laser ablation parameters (ESL imageBIO266) | value                |
| spot size                                   | 10 $\mu\text{m}$     |
| interline distance ( <i>y</i> )             | 10 $\mu\text{m}$     |
| overlap ( <i>x</i> )                        | 0 $\mu\text{m}$      |
| repetition rate                             | 100 Hz               |
| laser power                                 | 60%                  |
| laser fluence                               | 15 J/cm <sup>2</sup> |
| sample energy                               | 0.010–0.015 mJ       |
| imaging cup flow rate (He)                  | 200 mL/min           |
| imaging chamber flow rate (He)              | 250 mL/min           |
| PEEK Tubing I.D.                            | 0.75 mm              |



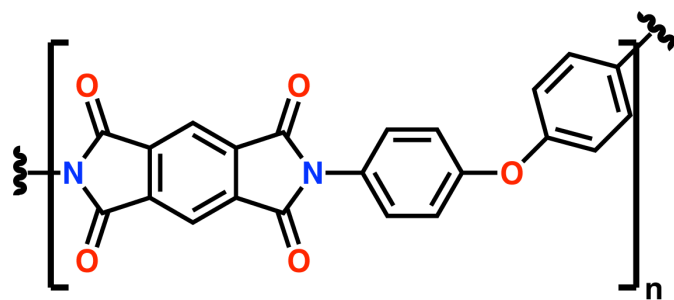

Kapton

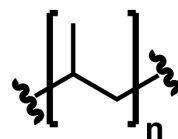

Prolene  
polypropylene

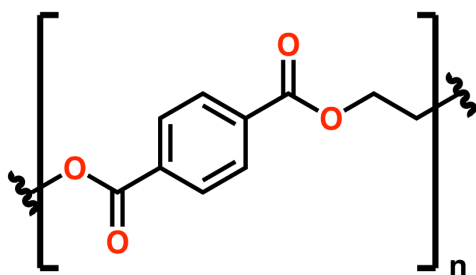

Mylar  
Ultra-polyester

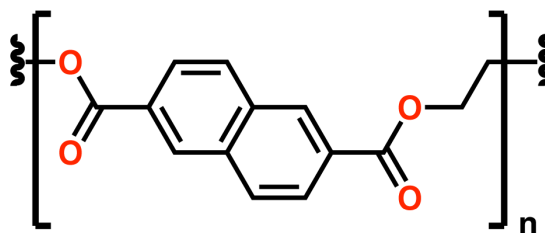

Etnom

**Figure S1.** Chemical structures of the substrates with well-characterized compositions.

**Table S3.** Elemental contents of substrates as determined by ICP-MS analysis of acid digests.<sup>a</sup>

|    | elemental content (µg element / g substrate) |                                             |                                             |                                  |                            |                          |                                    |                          |                            |                              |
|----|----------------------------------------------|---------------------------------------------|---------------------------------------------|----------------------------------|----------------------------|--------------------------|------------------------------------|--------------------------|----------------------------|------------------------------|
|    | Ultralene<br>( <i>n</i> = 2)                 | Kapton film <sup>b</sup><br>( <i>n</i> = 2) | Kapton film <sup>c</sup><br>( <i>n</i> = 2) | polypropylene<br>( <i>n</i> = 2) | Prolene<br>( <i>n</i> = 2) | Mylar<br>( <i>n</i> = 2) | Ultra-polyester<br>( <i>n</i> = 2) | Etnom<br>( <i>n</i> = 2) | Zythene<br>( <i>n</i> = 2) | Thermanox<br>( <i>n</i> = 4) |
| Mg | — <sup>d</sup>                               | — <sup>d</sup>                              | — <sup>d</sup>                              | — <sup>d</sup>                   | — <sup>d</sup>             | — <sup>d</sup>           | — <sup>d</sup>                     | — <sup>d</sup>           | — <sup>d</sup>             | 67.3                         |
| P  | — <sup>d</sup>                               | 238                                         | 385                                         | — <sup>d</sup>                   | — <sup>d</sup>             | 1,130                    | — <sup>d</sup>                     | — <sup>d</sup>           | — <sup>d</sup>             | 43.5                         |
| S  | — <sup>d</sup>                               | — <sup>d</sup>                              | — <sup>d</sup>                              | — <sup>d</sup>                   | — <sup>d</sup>             | — <sup>d</sup>           | — <sup>d</sup>                     | — <sup>d</sup>           | — <sup>d</sup>             | — <sup>d</sup>               |
| Ca | 144                                          | 320                                         | 546                                         | — <sup>d</sup>                   | — <sup>d</sup>             | 2,060                    | 2,220                              | 204                      | 96.2                       | — <sup>d</sup>               |
| V  | — <sup>d</sup>                               | — <sup>d</sup>                              | — <sup>d</sup>                              | — <sup>d</sup>                   | — <sup>d</sup>             | — <sup>d</sup>           | — <sup>d</sup>                     | — <sup>d</sup>           | — <sup>d</sup>             | — <sup>d</sup>               |
| Cr | — <sup>d</sup>                               | — <sup>d</sup>                              | — <sup>d</sup>                              | — <sup>d</sup>                   | — <sup>d</sup>             | — <sup>d</sup>           | — <sup>d</sup>                     | — <sup>d</sup>           | — <sup>d</sup>             | — <sup>d</sup>               |
| Mn | — <sup>d</sup>                               | — <sup>d</sup>                              | — <sup>d</sup>                              | — <sup>d</sup>                   | — <sup>d</sup>             | — <sup>d</sup>           | — <sup>d</sup>                     | 59.2                     | 58.9                       | 21.8                         |
| Fe | — <sup>d</sup>                               | — <sup>d</sup>                              | — <sup>d</sup>                              | — <sup>d</sup>                   | — <sup>d</sup>             | — <sup>d</sup>           | — <sup>d</sup>                     | — <sup>d</sup>           | — <sup>d</sup>             | — <sup>d</sup>               |
| Co | — <sup>d</sup>                               | — <sup>d</sup>                              | — <sup>d</sup>                              | — <sup>d</sup>                   | — <sup>d</sup>             | — <sup>d</sup>           | — <sup>d</sup>                     | — <sup>d</sup>           | — <sup>d</sup>             | 0.669                        |
| Ni | — <sup>d</sup>                               | — <sup>d</sup>                              | — <sup>d</sup>                              | — <sup>d</sup>                   | — <sup>d</sup>             | — <sup>d</sup>           | — <sup>d</sup>                     | — <sup>d</sup>           | — <sup>d</sup>             | — <sup>d</sup>               |
| Cu | — <sup>d</sup>                               | — <sup>d</sup>                              | — <sup>d</sup>                              | — <sup>d</sup>                   | — <sup>d</sup>             | — <sup>d</sup>           | — <sup>d</sup>                     | — <sup>d</sup>           | — <sup>d</sup>             | — <sup>d</sup>               |
| Zn | — <sup>d</sup>                               | — <sup>d</sup>                              | — <sup>d</sup>                              | — <sup>d</sup>                   | — <sup>d</sup>             | — <sup>d</sup>           | — <sup>d</sup>                     | — <sup>d</sup>           | — <sup>d</sup>             | — <sup>d</sup>               |
| Se | — <sup>d</sup>                               | — <sup>d</sup>                              | — <sup>d</sup>                              | — <sup>d</sup>                   | — <sup>d</sup>             | — <sup>d</sup>           | — <sup>d</sup>                     | — <sup>d</sup>           | — <sup>d</sup>             | — <sup>d</sup>               |
| Mo | — <sup>d</sup>                               | — <sup>d</sup>                              | — <sup>d</sup>                              | — <sup>d</sup>                   | — <sup>d</sup>             | — <sup>d</sup>           | — <sup>d</sup>                     | — <sup>d</sup>           | — <sup>d</sup>             | — <sup>d</sup>               |

<sup>a</sup>Elemental content in substrates reported as an average of *n* experimental replicates. <sup>b</sup>Kapton film manufactured by SPEX. <sup>c</sup>Kapton film manufactured by Chemplex.

<sup>d</sup>Result was less than that of the method blank (240 µL of acid digest diluted to 10 mL—Mg: 1.466; P: 7.227; S: 17.486; Ca: 9.988, V: 0.029, Cr: 0.186; Mn: 0.062; Fe: 1.513; Co: 0.003; Ni: 0.498; Cu: 13.628; Zn: 0.582; Se: 0.004; Mo: 0.007 ng element / g ICP sample).

**Table S4.** Elemental minimum detection limits X-ray fluorescence microscopy when using a given substrate.<sup>a</sup>

|    | XFM minimum detection limit with a given substrate ( $\mu\text{g cm}^{-2}$ ) <sup>b</sup> |                        |                          |                          |                        |                        |                        |                        |                        |                        |           |             |
|----|-------------------------------------------------------------------------------------------|------------------------|--------------------------|--------------------------|------------------------|------------------------|------------------------|------------------------|------------------------|------------------------|-----------|-------------|
|    | silicon nitride                                                                           | Ultralene              | Kapton film <sup>c</sup> | Kapton film <sup>d</sup> | polypropylene          | Prolene                | Mylar                  | Ultra-polyester        | Etnom                  | Zythene                | Thermanox | Kapton tape |
| Si | 6.826                                                                                     | 0.3142                 | 0.5589                   | 0.5900                   | 0.3510                 | 0.3389                 | 0.5293                 | 0.4185                 | 0.9582                 | 1.383                  | 1.549     | 9.250       |
| P  | 0.3228                                                                                    | 0.2602                 | 1.037                    | 1.114                    | 0.3074                 | 0.2867                 | 1.194                  | 0.5059                 | 0.3244                 | 0.4553                 | 0.8964    | 1.649       |
| S  | 0.09515                                                                                   | 0.1907                 | 0.3031                   | 0.3314                   | 0.2321                 | 0.2296                 | 0.2818                 | 0.2710                 | 0.1876                 | 0.2128                 | 0.5539    | 0.7098      |
| Cl | 0.2458                                                                                    | 0.08375                | 0.1226                   | 0.1338                   | 0.1014                 | 0.09749                | 0.1115                 | 0.1072                 | 0.07938                | 0.09068                | 0.3835    | 0.3017      |
| K  | 0.03957                                                                                   | 0.04744                | 0.06443                  | 0.07757                  | 0.06276                | 0.06236                | 0.07444                | 0.07326                | 0.04910                | 0.05271                | 0.2054    | 0.1763      |
| Ca | 0.02111                                                                                   | 0.03381                | 0.9654                   | 0.6879                   | 0.04161                | 0.03372                | 0.5784                 | 0.3636                 | 0.06598                | 0.07577                | 0.4748    | 0.1612      |
| Ti | 0.01374                                                                                   | 0.01085                | 0.01717                  | 0.01764                  | 0.01334                | 0.01278                | 0.04012                | 0.02127                | $9.842 \times 10^{-3}$ | 0.01446                | 0.09650   | 0.05815     |
| V  | $7.102 \times 10^{-3}$                                                                    | $6.256 \times 10^{-3}$ | 0.01161                  | 0.01223                  | $7.934 \times 10^{-3}$ | $5.387 \times 10^{-3}$ | 0.01338                | $7.995 \times 10^{-3}$ | $6.496 \times 10^{-3}$ | $9.290 \times 10^{-3}$ | 0.06027   | 0.04250     |
| Cr | $9.000 \times 10^{-3}$                                                                    | $6.700 \times 10^{-3}$ | $9.774 \times 10^{-3}$   | 0.01069                  | $6.960 \times 10^{-3}$ | $6.279 \times 10^{-3}$ | $6.104 \times 10^{-3}$ | $6.384 \times 10^{-3}$ | $5.742 \times 10^{-3}$ | $8.504 \times 10^{-3}$ | 0.08699   | 0.03349     |
| Mn | 0.01931                                                                                   | $5.937 \times 10^{-3}$ | $7.952 \times 10^{-3}$   | $8.210 \times 10^{-3}$   | $6.055 \times 10^{-3}$ | $5.759 \times 10^{-3}$ | $6.440 \times 10^{-3}$ | $6.759 \times 10^{-3}$ | 0.02106                | 0.03524                | 0.1032    | 0.02615     |
| Fe | $8.902 \times 10^{-3}$                                                                    | $9.654 \times 10^{-3}$ | $1.312 \times 10^{-3}$   | 0.01487                  | 0.01016                | 0.01010                | $1.249 \times 10^{-3}$ | 0.01119                | 0.01179                | 0.01679                | 0.05196   | 0.03215     |
| Co | $3.465 \times 10^{-3}$                                                                    | $3.583 \times 10^{-3}$ | $5.442 \times 10^{-3}$   | $5.601 \times 10^{-3}$   | $3.747 \times 10^{-3}$ | $3.344 \times 10^{-3}$ | $4.065 \times 10^{-3}$ | $3.946 \times 10^{-3}$ | $2.991 \times 10^{-3}$ | $4.080 \times 10^{-3}$ | 0.03099   | 0.01712     |
| Ni | $2.634 \times 10^{-3}$                                                                    | $4.772 \times 10^{-3}$ | $7.207 \times 10^{-3}$   | $7.333 \times 10^{-3}$   | $4.970 \times 10^{-3}$ | $4.487 \times 10^{-3}$ | $4.917 \times 10^{-3}$ | $5.016 \times 10^{-3}$ | $3.856 \times 10^{-3}$ | $5.453 \times 10^{-3}$ | 0.02723   | 0.02221     |
| Cu | $5.629 \times 10^{-3}$                                                                    | $6.532 \times 10^{-3}$ | $7.173 \times 10^{-3}$   | $7.841 \times 10^{-3}$   | $6.590 \times 10^{-3}$ | $6.583 \times 10^{-3}$ | $7.080 \times 10^{-3}$ | $7.838 \times 10^{-3}$ | $6.470 \times 10^{-3}$ | $6.853 \times 10^{-3}$ | 0.03475   | 0.01614     |
| Zn | $3.488 \times 10^{-3}$                                                                    | $4.114 \times 10^{-3}$ | $5.856 \times 10^{-3}$   | $5.729 \times 10^{-3}$   | $4.019 \times 10^{-3}$ | $3.818 \times 10^{-3}$ | $4.106 \times 10^{-3}$ | $4.038 \times 10^{-3}$ | $3.510 \times 10^{-3}$ | $4.176 \times 10^{-3}$ | 0.04045   | 0.01619     |

<sup>a</sup>As determined with X-ray fluorescence microscopy at 8BM-B (Advanced Photon Source, Argonne National Laboratory) with dwell time = 0.050 s and incident energy of 10 keV. <sup>b</sup>Minimum detection limit =  $3\sigma$ , where  $\sigma$  is the standard deviation of areal elemental content across all pixels. <sup>c</sup>Kapton film manufactured by SPEX. <sup>d</sup>Kapton film manufactured by Chemplex

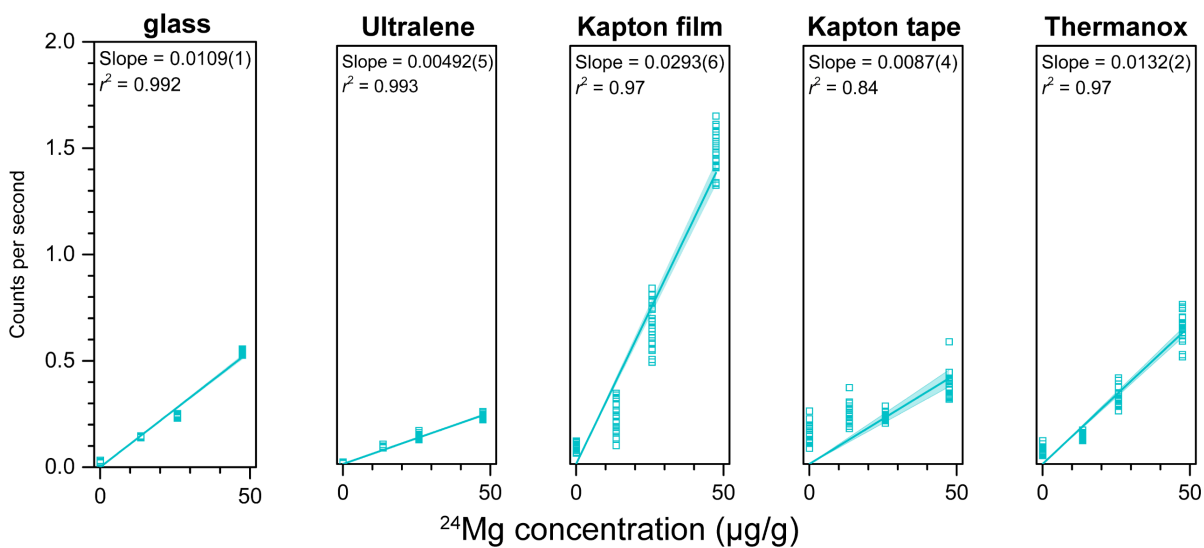

**Figure S2.** Calibration curves for  $^{24}\text{Mg}$  quantitation by LA-ICP-TOF-MS of gelatin standards adhered on substrates. The Kapton film was manufactured by SPEX.

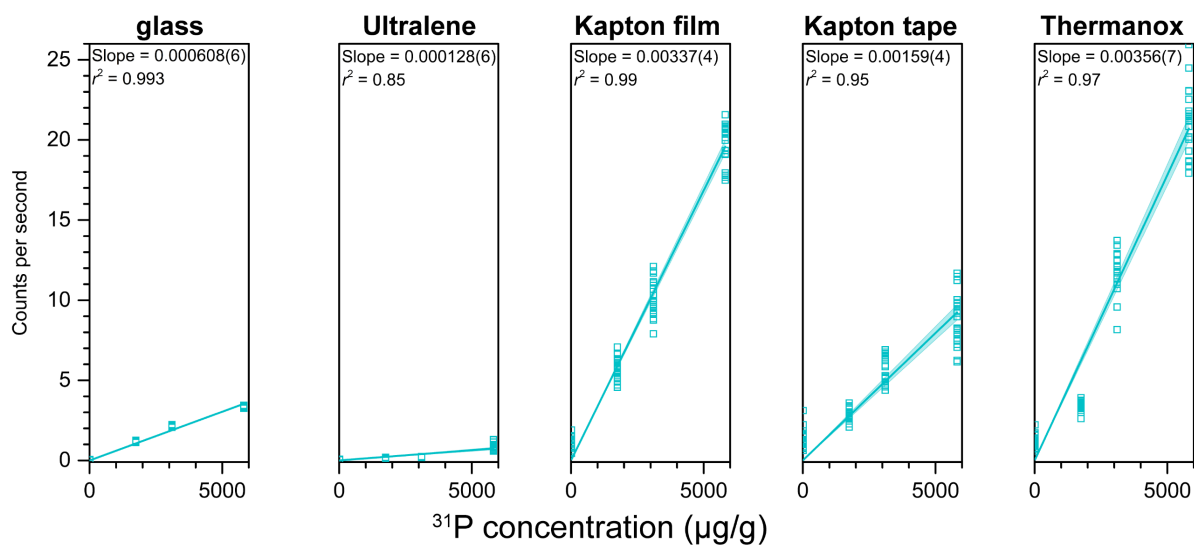

**Figure S3.** Calibration curves for  $^{31}\text{P}$  quantitation by LA-ICP-TOF-MS of gelatin standards adhered on substrates. The Kapton film was manufactured by SPEX.

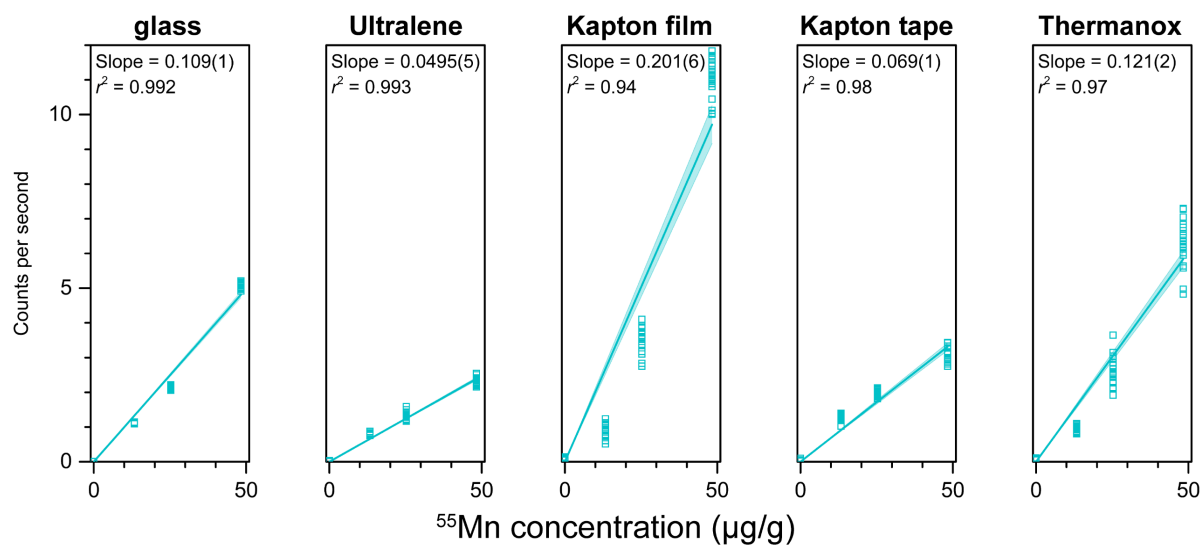

**Figure S4.** Calibration curves for  $^{55}\text{Mn}$  quantitation by LA-ICP-TOF-MS of gelatin standards adhered on substrates. The Kapton film was manufactured by SPEX.

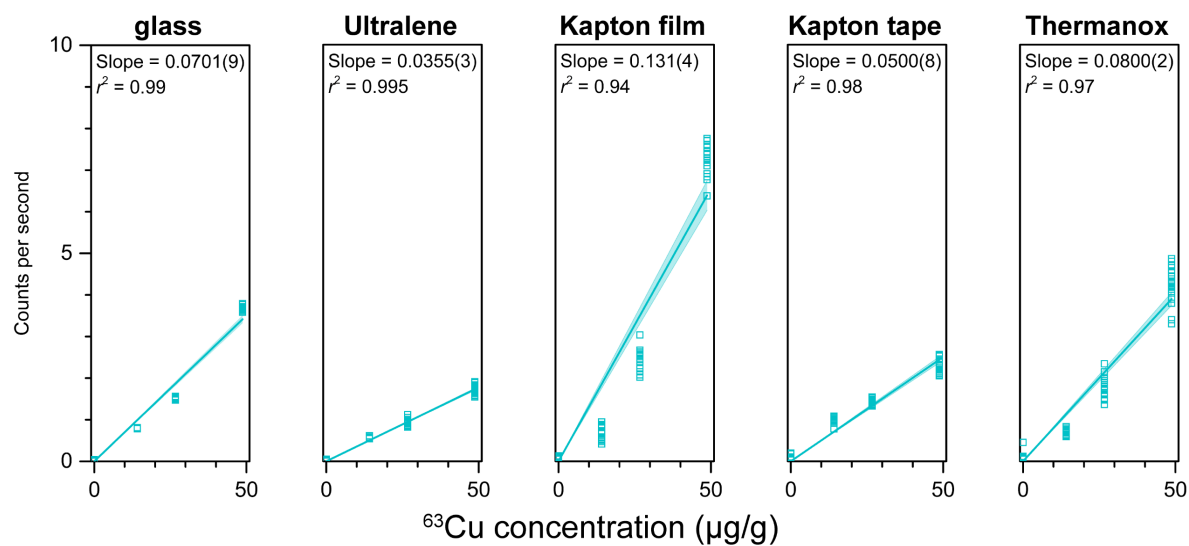

**Figure S5.** Calibration curves for  $^{63}\text{Cu}$  quantitation by LA-ICP-TOF-MS of gelatin standards adhered on substrates. The Kapton film was manufactured by SPEX.

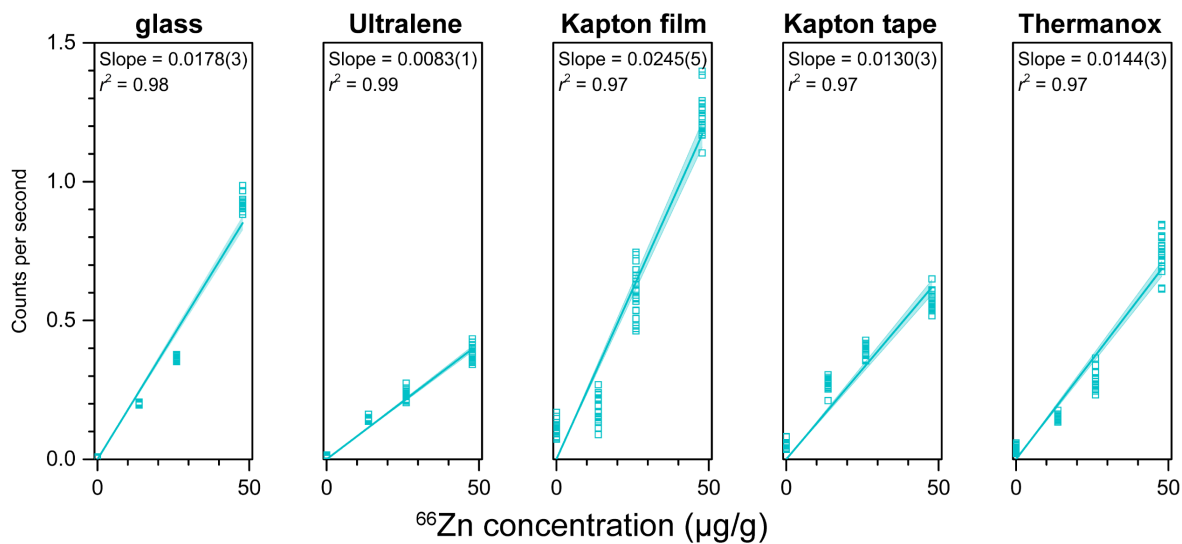

**Figure S6.** Calibration curves for  $^{66}\text{Zn}$  quantitation by LA-ICP-TOF-MS of gelatin standards adhered on substrates. The Kapton film was manufactured by SPEX.



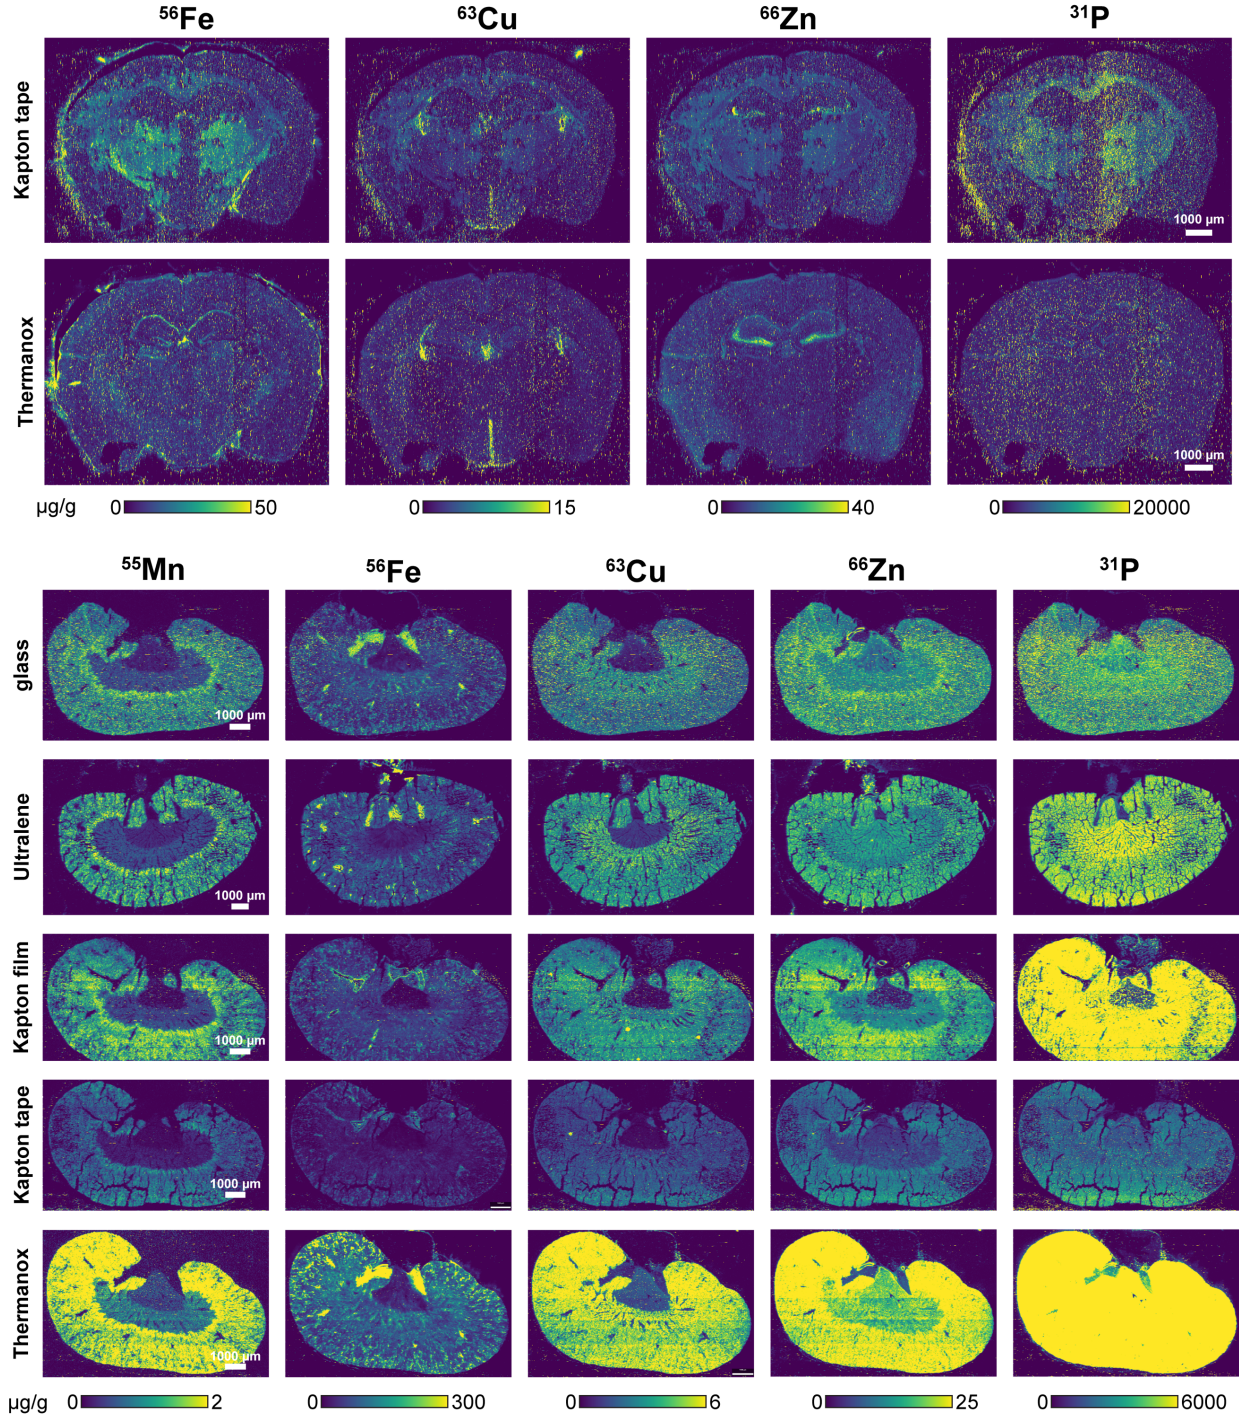

**Figure S7.** Elemental maps of  $^{56}\text{Fe}$ ,  $^{63}\text{Cu}$ ,  $^{66}\text{Zn}$ ,  $^{31}\text{P}$  of mouse brain on Kapton tape, and Thermanox and elemental maps of  $^{55}\text{Mn}$ ,  $^{56}\text{Fe}$ ,  $^{63}\text{Cu}$ ,  $^{66}\text{Zn}$ , and  $^{31}\text{P}$  of mouse kidney on glass, Ultralene, Kapton film (SPEX), Kapton tape, and Thermanox show substrate-dependent ablation characteristics. Mouse brain was embedded in OCT media and frozen at  $-80\text{ }^{\circ}\text{C}$  freezer overnight. Mouse kidney was embedded in OCT media and was frozen by plunging the plastic mold into isopentane chilled over liquid nitrogen. The tissues were sectioned at  $20\text{ }\mu\text{m}$  thickness sequentially onto the substrates. All samples were ablated at laser fluence of  $2.7\text{ J}/\text{cm}^2$  (corresponding to 40% laser power) with  $10\text{-}\mu\text{m}$  spot size. Brain scans on glass, Ultralene, and Kapton film are presented on the main manuscript (see Fig. 6).

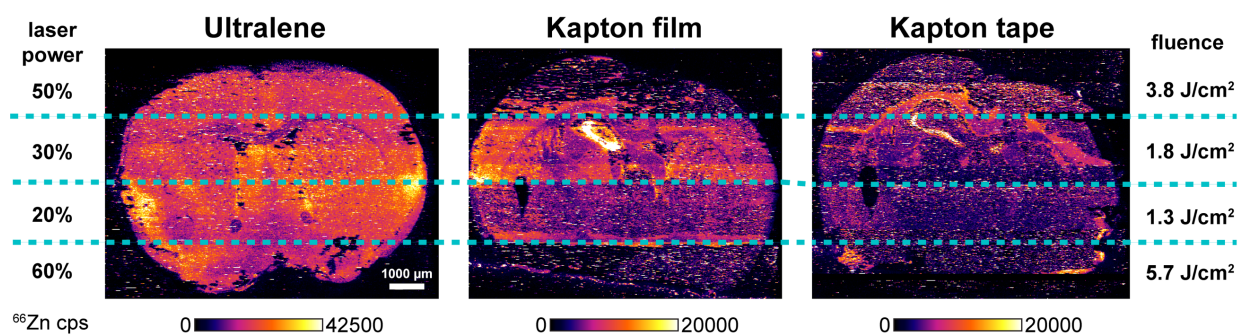

**Figure S8.** Laser fluence testing (“Easter Egg” power test) of 20- $\mu$ m thick murine brain tissue deposited onto Ultralene, Kapton film (SPEX), and Kapton tape to determine optimal ablation conditions for each substrate. Each panel shows four horizontal raster regions corresponding to fluences of 3.8, 1.8, 1.3, and 5.7 J/cm<sup>2</sup> (50%, 30%, 20% and 60% laser power, top to bottom). Maps display raw <sup>66</sup>Zn counts per second (cps). Horizontal guides demarcate raster regions to facilitate comparison across fluence settings. Lower fluence produced cleaner ablation for Kapton film and Kapton tape, while Ultralene supported a wider fluence range.
